# Supplementary material for: Controlling the ambipolarity of thieno-benzo-isoindigo polymer-based transistors: the balance of face-on and edge-on populations
Source: Royal Society of Chemistry journal article supplement (doi:10.1039/c9tc05641f), 2019-11-25
Supplement: c9tc05641f1.pdf [file c9tc05641f1.pdf]

## Electronic Supplementary Information

### **Controlling Dominant Polarity and Ambipolarity of Thieno-Benzo-Isoindigo Polymers-Based Transistors: The Role of Face-on and Edge-on Population**

Jungho Lee,<sup>a,†</sup> Eun-Sol Shin,<sup>b,†</sup> Yeon-Ju Kim,<sup>c</sup> Yong-Young Noh<sup>b\*</sup> and Changduk Yang<sup>a\*</sup>

<sup>a</sup>Department of Energy Engineering, School of Energy and Chemical Engineering, Perovtronic Research Center, Low Dimensional Carbon Materials Center, Ulsan National Institute of Science and Technology (UNIST), Ulsan 44919, Republic of Korea.  
Email: yang@unist.ac.kr

<sup>b</sup>Department of Chemical Engineering, Pohang University of Science and Technology, 77 Cheongam-Ro, Nam-Gu, Pohang 37673, Republic of Korea.  
Email: yynoh@postech.ac.kr

<sup>c</sup>Research Institute for Solar and Sustainable Energies (RISE), Heeger Center for Advanced Materials (HCAM), School of Materials Science and Engineering (MSE), Gwangju Institute of Science and Technology (GIST), 123 Cheomdan-gwagiro Buk-gu, Gwangju 61005, Republic of Korea.

Correspondence and requests for materials should be addressed to Y. Y. Noh (yynoh@postech.ac.kr) and C. Yang (yang@unist.ac.kr)

<sup>†</sup>These authors contributed to the work equally.

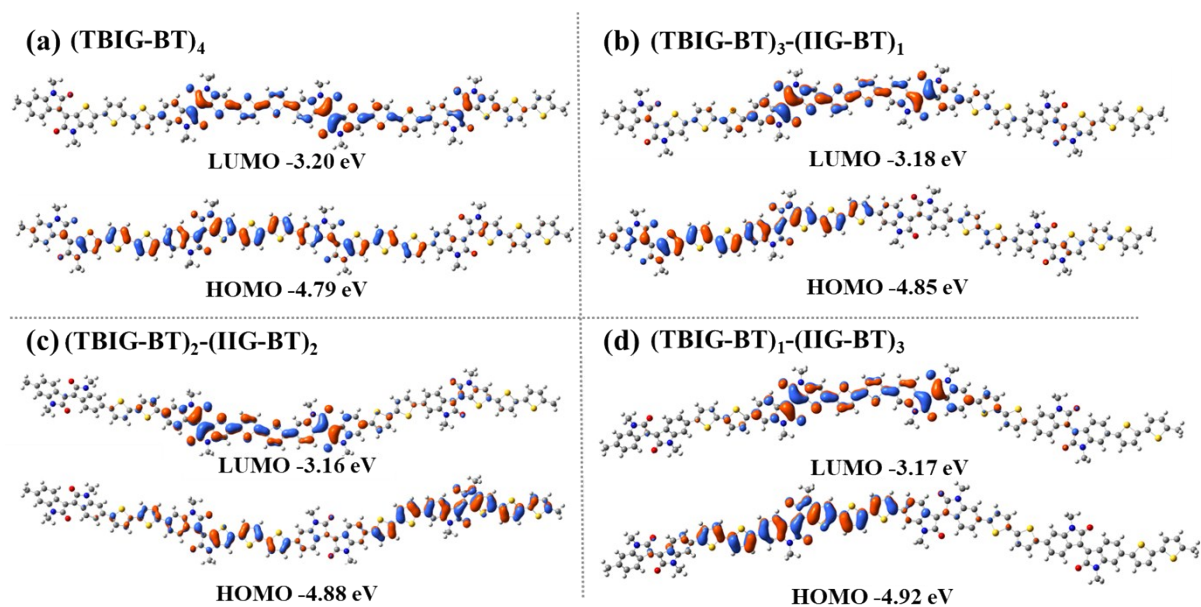

**Fig. S1** Optimized molecular geometries of tetramers of TBIG and IIG segments with calculated LUMOs and HOMOs of (a) (TBIG-BT)<sub>4</sub>, (b) (TBIG-BT)<sub>3</sub>-(IIG-BT)<sub>1</sub>, (c) (TBIG-BT)<sub>2</sub>-(IIG-BT)<sub>2</sub>, and (d) (TBIG-BT)<sub>1</sub>-(IIG-BT)<sub>3</sub>.

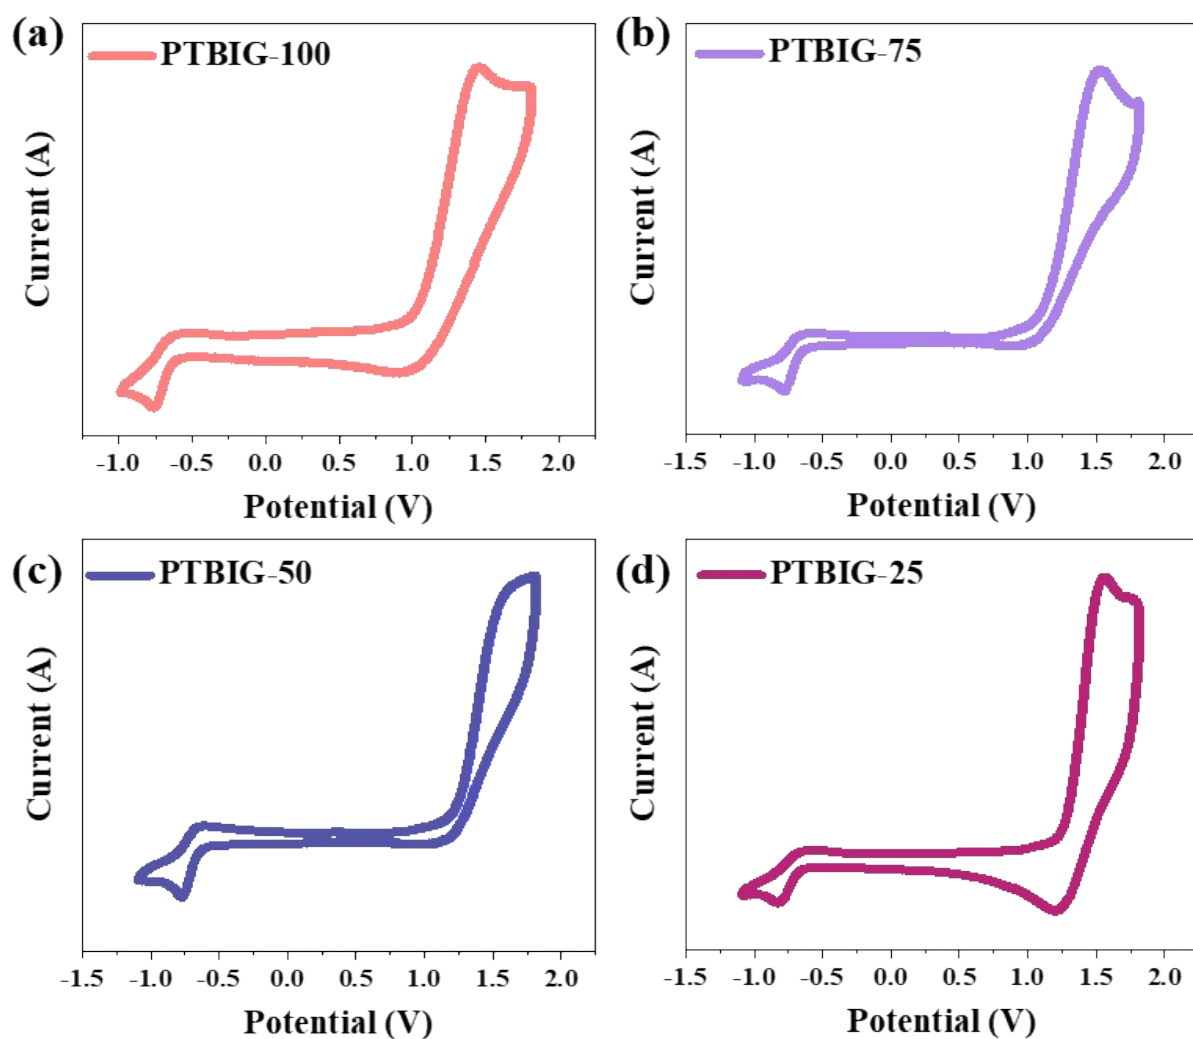

**Fig. S2** Cyclic voltammograms of (a) PTBIG-100, (b) PTBIG-75, (c) PTBIG-50, and (d) PTBIG-25.

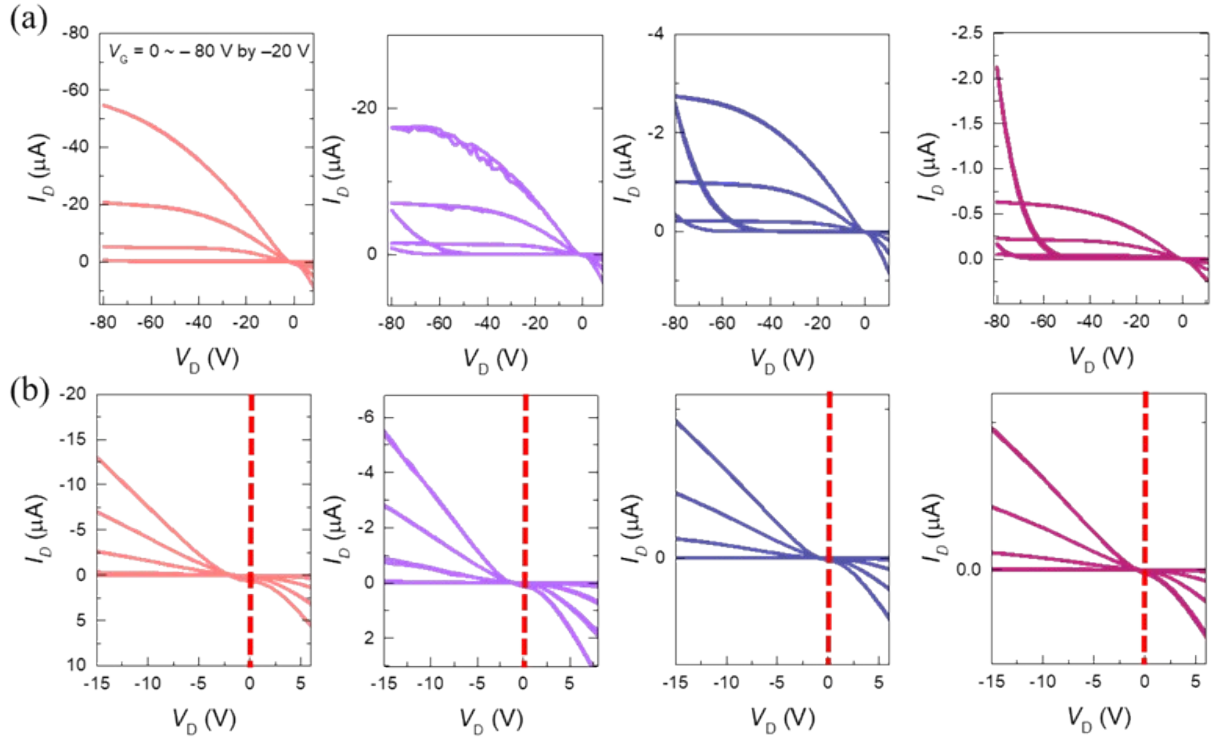

**Fig. S3** (a) Output characteristics for TBIG:IIG OFETs with 100:0, 75:25, 50:50, and 25:75; (b) Enlarged figure of output curves in linear regime.

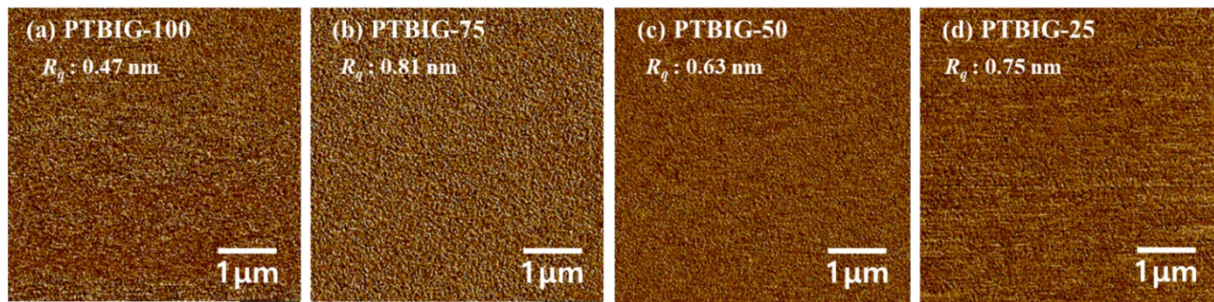

**Fig. S4** The AFM height images of (a) PTBIG-100, (b) PTBIG-75, (c) PTBIG-50, and (d) PTBIG-25.

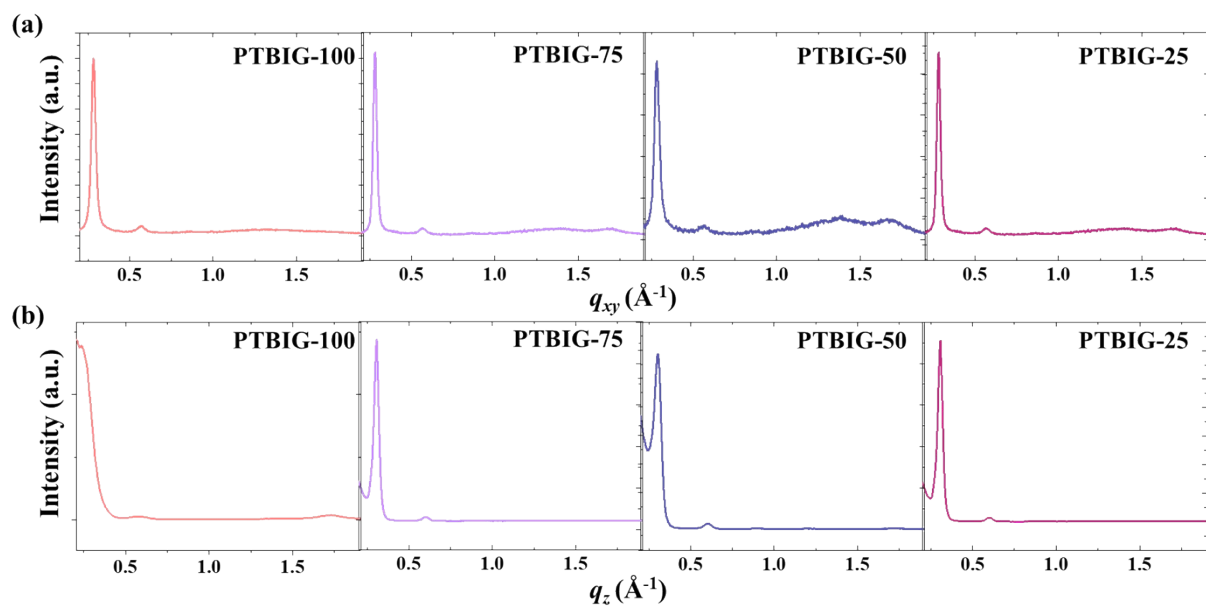

**Fig. S5** 1-D profile for TBIG-based polymers films (a) in plane and (b) out of plane.
